1    **Symptoms of Depression among Outpatients with Acute Respiratory Infection in**  
2    **Metropolitan Local Government Areas of Kaduna State, Nigeria**

3    Gregory C. Umeh<sup>1</sup>\*, Laurent Cleenwerck de Kiev<sup>2</sup>, Jabani Mamza<sup>1</sup>, Aliyu Atiku<sup>1</sup>, Suleiman  
4    Mohammed<sup>1</sup>, Dauda S. Hananiya<sup>1</sup>, Moses Onoh<sup>1</sup>, Habibu B. Yahaya<sup>1</sup>, Basirat Adeoti<sup>1</sup>, Rabiya T.  
5    Musa<sup>1</sup>, Mutiu Adegbite<sup>1</sup>, Sunday Audu<sup>1</sup>, Jeremiah Daikwo<sup>3</sup>, Neyu Iliyasu<sup>4</sup>, Amina Mohammed  
6    Baloni<sup>5</sup>

7    <sup>1</sup>World Health Organization, Kaduna, Nigeria

8    <sup>2</sup>International Faculty Coordinator, Euclid University, Banjul, The Gambia

9    <sup>3</sup>Epidemiologist, Kaduna State Ministry of Health, Kaduna, Nigeria

10    <sup>4</sup>Incident Manager, State Emergency Operations Centre (sEOC), Kaduna, Nigeria

11    <sup>5</sup>Commissioner, Kaduna State Ministry of Health, Kaduna, Nigeria

12    \*Corresponding Author

13    E-mail: [umehg@who.int](mailto:umehg@who.int)

14    **Key Words:**

15    COVID-19,

16    Symptoms of Depression,

17    Outpatients, COVID-19, Acute Respiratory Infection,

18    Kaduna State

19

## Abstract

### 20 **Background**

21 The novel SARS-CoV-2 virus that causes Coronavirus disease (COVID-19) has redefined global  
22 health and response to Acute Respiratory Infection (ARI). The outbreak of a cluster of influenza-  
23 like illnesses in Wuhan, China, has morphed into a pandemic in the last quarter of 2019,  
24 stretching from South East Asia to Europe, The Americas, Africa, and the Australian  
25 subcontinent.

### 26 **Materials and Methods**

27 We shall utilize a cross-sectional, observational design to investigate the prevalence of  
28 symptoms of depression among outpatients with ARI and describe the characteristics of  
29 outpatients with ARI in Kaduna State.

### 30 **Results**

31 The prevalence of symptoms of depression was 19.6% for respondents with symptoms of ARI,  
32 and 14.4%, for those without symptoms of ARI. On no risk of depression, we had a higher  
33 proportion of the respondents without symptoms of ARI (86%) than those with symptoms of  
34 depression (80%) (M=318.4, SD=29.62 case, and M=344.0, SD=14.2 control,  $r=0.88$ , CI=13.5 to  
35 6.5,  $P=0.000952$ ). Likewise, in the category with mild risk of depression, respondents without  
36 symptoms of ARI were fewer (10%) than those with symptoms of depression (15%) (M=58.4,  
37 SD=26.0 case, and M=42.1, SD=12.7 control,  $r=0.86$ , CI=11.8 to 5.8,  $P=0.0136$ ). There was no  
38 significant difference between respondents with symptoms of ARI and without symptoms of ARI  
39 in the categories of moderate (M=13.6, SD=5.1 case, and M=11.6, SD=4.6 control,  $r=0.87$ ,

40 CI=2.3 to 2.1, P=0.178) and high (M=5.6, SD=2.5 case, and M=4.4, SD=3.2 control, r=0.61,  
41 CI=1.2 to 1.5, P=0.174) risk of depression.

## 42 **Conclusion**

43 Symptoms of depression were commoner among respondents who presented with symptoms of  
44 Acute Respiratory Infection (ARI) at the Outpatient Department (OPD). However, further  
45 explanatory research is needed to establish causality.

46

47

48

## Introduction

49 The novel SARS-CoV-2 virus that causes Coronavirus disease (COVID-19) has redefined global  
50 health and response to Acute Respiratory Infection (ARI) [1-4]. The outbreak of a cluster of  
51 influenza-like illnesses in Wuhan, China, has morphed into a pandemic in the last quarter of  
52 2019, stretching from South East Asia to Europe, The Americas, Africa, and the Australian  
53 subcontinent [5]. The World Health Organization (WHO) declared COVID-19 a Public Health  
54 Emergency of International Concern (PHEIC) in January 2020 and a pandemic in March 2020  
55 [6, 7]. The statistics are grim, with over 666 million laboratory-confirmed cases and 6 million  
56 death recorded globally as of 15th January 2023 [8]. Nigeria's first confirmed COVID-19 case  
57 was on 14th February 2020, and has recorded 266, 463 confirmed cases and 3, 155 deaths as of  
58 15th January 2023 [9, 10]. Kaduna State, a subnational entity in federal Nigeria, had the first  
59 confirmed COVID-19 case on 28th March 2020, and a total of 11, 630 confirmed cases with 90  
60 deaths as of 15th January 2023 [9]. The four metropolitan Local Government Areas (LGAs) of  
61 Chikun, Igabi, Kaduna North, and Kaduna South account for over 50% of all confirmed cases in  
62 Kaduna State [9].

63 Acute Respiratory Infection, like COVID-19, usually presents as cough, sneezing, sore throat,  
64 and difficulty breathing, with or without fever, and is transmitted through contact with an  
65 infected person or their secretions [11-13]. Other symptoms are body weakness, loss of smell,  
66 diarrhea, abdominal pains, and some non-specific symptoms [14]. The prognosis of COVID-19  
67 is worse in the elderly and those with other co-existing conditions, for example, diabetes,  
68 hypertension, asthma, and so forth [15]. Many COVID-19 cases are asymptomatic, and  
69 laboratory test using Reverse Transcriptase Polymerase Chain Reaction (RT-PCR) and Rapid  
70 Diagnostic Test (RDT) is essential in diagnosis and case confirmation [16]. Like many low and

71 middle-income countries (LMIC), Nigeria has low testing rates, making COVID-19 diagnosis  
72 difficult and the efforts to contain the pandemic challenges [17].

73 COVID-19 now has a vaccine, but before vaccine discovery and licensing, the mainstay of  
74 response was non-pharmaceutical interventions (NPI), regular handwashing with soap under  
75 running water; respiratory hygiene, and coughing into a bent elbow; physical distancing of at  
76 least 2 meters; use of face masks; hand sanitizers; environmental sanitation; lockdown and  
77 restriction of movements and other administrative measures [18-21]. COVID-19 rollout has not  
78 been even, as the high-income countries account for over 80% of current vaccine uptake [22].  
79 The COVAX facility, led by World Health Organization (WHO), Coalition for Epidemic  
80 Preparedness Innovation (CEPI), and UNICEF, have supported LMICs, and the COVID-19  
81 vaccine rollout has commenced in Nigeria and other developing countries [23].

82 The symptoms of depression are common, and a study by Gureje et al. has shown a prevalence  
83 of 5% among the general population in major Nigerian cities [24]. The cardinal symptoms of  
84 depression are low mood, loss of interest in pleasurable activities, and worthlessness. Other  
85 symptoms are lack of energy, loss of appetite, body weakness, sadness, suicidal ideation, etc.  
86 COVID-19 sometimes manifests with symptoms of depression, which the isolation may worsen,  
87 restriction of movements, and lockdown in response to the COVID-19 pandemic [25].

88 Little or no studies have investigated the prevalence of symptoms of depression among  
89 outpatients with ARI nor described the characteristics of outpatients with ARI in Kaduna State.

90 The response to COVID-19 is a combination of measures ranging from enforcement of NPI,  
91 vaccination, and symptomatic and supporting treatment of patients, working with governments,  
92 NGOs, development partners, and citizens [26]. Vaccine hesitancy, low-risk perception of

93 COVID-19 by citizens, mistrust of government, conspiracy theories, myths, and fake news have  
94 weakened compliance and enforcement of COVID-19 preventive measures.

95 The study described the characteristics of outpatients who presented with ARI to clinics and  
96 hospitals in four metropolitan LGAs of Kaduna State, determined the prevalence of ARI among  
97 these patients, and evaluated the relationship between ARI and symptoms of depression among  
98 the outpatients and a control group.

99

100

## Materials and Methods

### 101 Study Design

102 We utilized a cross-sectional design, investigated the prevalence of symptoms of depression  
103 among outpatients with ARI, and described the characteristics of outpatients with ARI in Kaduna  
104 State. We evaluated the relationship between ARI and symptoms of depression among the  
105 outpatients and a control group.

106

### 107 Study Setting

108 Four (4) metropolitan Local Government Areas of Chikun, Igabi, Kaduna North, and Kaduna  
109 South were purposefully sampled because they have contributed to >50% of the total COVID-19  
110 burden in Kaduna State since the outset of the pandemic in March 2020. Kaduna State is in  
111 Nigeria's Northwestern region, with a projected population of 9.7 million (2006 census) [27]. It  
112 was the former capital of Northern Nigeria before Independence in 1960 and home to many  
113 tribes in Nigeria. Kaduna State has 23 LGAs, and 255 wards (the lowest administrative unit).  
114 The Infant Mortality rate (170/1000) and the maternal mortality rate (230/100000) are below the  
115 national average. The state health insurance scheme has enrolled about 5% of the total  
116 population (state employees), and the rest access health services through out-of-pocket expenses  
117 [X]. The predominant tribes are Hausa and Fulani, ethnic groups. Other ethnic groups are Gwari,  
118 Kadara, Bajju, Kataf, etc. Christianity, Islam, and traditional faith are the dominant religions.  
119 The state has a boundary with Kano State (north), Plateau and Nassarawa States (south), Bauchi  
120 State (east), and NigerState e(west). Kaduna State is an agricultural state and one of Nigeria's  
121 leading ginger, maize, and millet producers [27].

122

### 123 **Study Population**

124 The study population consisted of outpatients who presented with symptoms of ARI to primary,  
125 secondary, or tertiary health facilities, both private and public, in the four metropolitan LGAs in  
126 the last two weeks before the study and a control group.

### 127 **Sampling Technique**

128 The researcher conducted a stratified random sampling of health facilities (primary, secondary &  
129 tertiary), both private and public. The total health facilities in the state range from Primary  
130 Health Centre (PHC) (1725), secondary facilities (29), tertiary facilities (6), and private facilities  
131 (534). The four metropolitan LGAs accounted for 13% (221) of total PHC, 20% (6) of secondary  
132 health facilities, 50% (1) of tertiary health facilities, and 33% (178) of private health facilities. A  
133 total of 33 (15%) PHCs, five (83%) secondary health facilities, one (50%) tertiary health facility,  
134 and 33 (19%) private health facilities were sampled from the four metropolitan LGAs. The  
135 sample distribution was based on probability proportional to size (PPS).

### 136 **Sample Size Estimation [28]**

$$137 \quad \text{Sample size} = \frac{Z^2 * (p) * (1-p)}{c^2}$$

139 Where:

140 Z = Z value (e.g., 1.96 for 95% confidence level)

141 p = percentage picking a choice, expressed as decimal



142 (.5 used for sample size needed)

143 c = confidence interval, expressed as decimal (0.05)

144

145 = 396 (case) and 402 (control) recruited

146 Total participants=798

147

## 148 **Study Tools**

149 Symptoms of depression: The researcher and his assistants utilized the Beck Depression  
150 Inventory (BDI) to measure the symptoms of depression among outpatients who presented with  
151 ARI. The BDI has undergone two major revisions: in 1978 as the BDI-IA and in 1996 as the  
152 Beck Depression Inventory-II (BDI-II). The updated BDI-II taps psychological and somatic  
153 manifestations of 2-week major depressive episodes, as operationalized in the DSM-IV.9 This  
154 version was modified to reword and replace some items. Four items of the BDI-IA that proved  
155 less sensitive for identification of typical symptoms of severe depression - weight loss, distorted  
156 body image, somatic preoccupation, and inability to work - were dropped and replaced by  
157 agitation, worthlessness, difficulty concentrating, and energy loss to assess a distinctive degree  
158 of intensity of depression. In addition, the items on appetite and sleep change were amended to  
159 evaluate the increase and decrease of these depression-related behaviors. Unlike the original  
160 version, the BDI-II does not reflect any particular theory of depression [29].

161 The BDI-II is a relevant psychometric instrument. It has high reliability and capacity to  
162 differentiate between depressed and non-depressed subjects and improved concurrent, content,

163 and structural validity. And from available psychometric data, the BDI-II is a cost-effective tool  
164 for measuring the severity of depression, with good applicability for research and clinical  
165 practice worldwide. The instrument has an internal consistency of 0.9 and retest reliability  
166 ranging from 0.73 to 0.96 [29].

167 ARI: the presence of at least fever and cough and any other symptoms (sneezing, sore throat,  
168 headache, body weakness, malaise, dizziness). The researcher and his assistants actively  
169 searched the health facility outpatients' registers for ARI.

170 Questionnaire: the questionnaire was translated to Hausa (local language) and back-translated to  
171 English to ensure internal consistency

## 172 **Procedure**

173 The researcher and his assistants administered the questionnaire to the randomly sampled  
174 outpatients from the outpatients' register maintained at the health facility. The interviews were  
175 conducted at the participant's home, and in some cases, by telephone in keeping with COVID-19  
176 protocol. The respondents were recruited and interviewed between 14th March and 15<sup>th</sup> April  
177 2022.

178 We compared the study population (outpatients) with matched control population (size, culture,  
179 locality, and socio-economic factors).

## 180 **Inclusion Criteria**

181 All outpatients, 13 years (BDI validated in 13 years and above) and above residents in the four  
182 metropolitan LGAs, who presented to the health facility in the last two weeks with ARI were  
183 sampled for the study.

184

## 185 **Exclusion Criteria**

186 Outpatients with known depression and patients with debilitating illnesses.

## 187 **Data Collation and Statistical Analysis**

188 The researchers used the SPSS (Statistical Package for Social Science) in data collation.

189 Descriptive statistics for proportions and measures of central tendencies were calculated. The

190 researcher ran paired samples t-test and compared the means of the study and control populations

191 at  $P < 0.05$ . The Pearson's Coefficient of correlations was computed for the measured variable

192 between the two groups.

## 193 **Ethical Consideration**

194 The researchers sought and obtained ethical approval (NHREC/17/03/2018) from the Kaduna

195 State Ministry of Health.

## 196 **Written Informed Consent**

197 Only respondents who willingly gave written informed consent participated in the study after a

198 clear protocol explanation.

199

200  
201  
202  
203  
204  
205  
206  
207  
208  
209  
210  
211  
212  
213  
214  
215  
216  
217  
218  
219  
220  
221

## Results

### General Characteristics of the Respondents

A total of 805 volunteers were recruited for the study, of which 798 (99.1%) consented to the interview, 396 (49.6%) respondents with ARI symptoms (case), and 402 (50.4%) those without ARI symptoms (control). Four (4) metropolitan LGAs of the 23 LGAs in Kaduna State (17%) participated in the study. Kaduna South has the highest number of respondents (case and control), 319 (40%), followed by Kaduna North 288 (36%), Chikun 144 (18%), and Igabi 47 (6%). A total of 33 wards (lowest administrative unit) participated in the study; Kaduna South had 13 (39%) wards, Kaduna North 12 (36%), Chikun 6 (18%), and Igabi 2 (6%). The research assistants interviewed respondents from 308 settlements out of the over 2000 settlements in the four metropolitan LGAs, with Kaduna South having the highest 107 (35%), followed by Kaduna North 99 (32%), Chikun 78 (25%), and Igabi 24 (8%). The mean age of the respondents who presented with symptoms of ARI (case) was 34 years, standard deviation (SD) of 15 and a range of 13 to 90 years, and that of the respondents without symptoms of ARI, a mean of 30, SD 12, and range 13 to 90 years. The sex distribution of the respondents was female 266 (67%), male 130 (33%), those with symptoms of ARI and female 242 (60%), male 160 (40%) those without symptoms of ARI. About 50% of the respondents have had 6 to 12 years of formal education (secondary education), case (47%), and control (53%) (see table 1). A higher proportion of the respondents, both case and control, were unemployed (31%), followed by house-wives (27%), petty traders (26%), and the least was big-time traders (2%) (see table 1). About 70% of the respondents, both case and control earn less than 1 USD per day, 25% make 1 USD per day, and 5% above 1 USD per day (Table 1).

## 222 **Features of Respondents Presenting with Symptoms of Acute Respiratory Infections**

223 The most frequent symptom among those with ARI was sore throat (25%); others were fever  
224 (21%), cough (20%), headache (14%), and the minor symptoms are abdominal pain, catarrh,  
225 dizziness, heartburn, and nausea (<1%) (Figure 1). The average duration of the symptoms was 3-  
226 4 days (46%), symptoms <14 days (93%), and >14 days (7%). The majority of the respondents  
227 with symptoms of ARI presented to Primary Healthcare Centre (PHC) (79%) for treatment,  
228 while the visit to a tertiary facility was the least (2%). Corollary, many of the respondents who  
229 visited PHC were attended to by Community Health Extension Workers (CHEW) (50%),  
230 Community Health Officer (CHO) (18%), and at other facilities by medical officers (19%), and  
231 the least consultant physician (4%). The most typical diagnoses among respondents who  
232 presented with symptoms of ARI were malaria (45%) and Typhoid fever (28%), and the least  
233 was COVID-19 and diabetes mellitus (<1%) (Figure 2). Most of the respondents who presented  
234 with symptoms of ARI were satisfied (97%) with the treatment received at the health facilities  
235 visited, and 89% of the respondents who sought treatment recovered after completing their  
236 treatment. The average recovery days were 3-4 days (44%), and 10% of the respondents stayed  
237 seven days and above before recovery from ARI symptoms. Among the respondents, 31% had a  
238 history of a family member presenting with ARI symptoms. Likewise, 35% of the respondents  
239 knew somebody outside the family who presented with symptoms of ARI (Table 2).

240

## 241 **Respondents' Scores on Beck's Depression Inventory**

242 The Beck Depression Inventory (BDI) classified the respondents into four categories (no risk of  
243 depression, mild, moderate, and high risk of depression) based on respondents' scores on the

244 items (Table 3). On no risk of depression, we had a higher proportion of the respondents without  
245 symptoms of ARI (86%) than those with symptoms of depression (80%) (M=318.4, SD=29.62  
246 case, and M=344.0, SD=14.2 control,  $r=0.88$ , CI=13.5 to 6.5,  $P=0.000952$ ). Likewise, in the  
247 category with mild risk of depression, respondents without symptoms of ARI were fewer (10%)  
248 than those with symptoms of depression (15%) (M=58.4, SD=26.0 case, and M=42.1, SD=12.7  
249 control,  $r=0.86$ , CI=11.8 to 5.8,  $P=0.0136$ . There was no significant difference between  
250 respondents with symptoms of ARI and without symptoms of ARI in the categories of moderate  
251 (M=13.6, SD=5.1 case, and M=11.6, SD=4.6 control,  $r=0.87$ , CI=2.3 to 2.1,  $P=0.178$ ) and high  
252 (M=5.6, SD=2.5 case, and M=4.4, SD=3.2 control,  $r=0.61$ , CI=1.2 to 1.5,  $P=0.174$ ) risk of  
253 depression. The prevalence of symptoms of depression was 19.6% (case) and 14.4% (control)  
254 (Table 4).

#### 255 **Association between Symptoms of ARI and Depression**

256 The commonest symptoms of depression among the respondents in both case and control were  
257 sleep disturbances, feelings of sadness, easy tiredness, and low appetite, of which the majority  
258 were female; I don't sleep well (male 38%, female 62%), I feel sad (male 37%, female 63%),  
259 easy tiredness (male 33%, female 67%), and low appetite (male 33%, female 67%).

260 The respondents who were unemployed (33%) and house-wives (30%) accounted for the  
261 commonest symptoms of depression (feeling of sadness, easy tiredness, disturbed sleep, and low  
262 appetite) observed among all respondents, both those with symptoms of ARI and those without  
263 the symptoms of ARI, while government workers (7%) and big-time traders (2%) had the least  
264 symptoms of depression.

265 The respondents who had diabetes and typhoid fever accounted for the most typical symptoms of  
266 depression (feeling of sadness, easy tiredness, disturbed sleep, and low appetite) observed among  
267 all respondents, both those with symptoms and without symptoms of ARI and those with  
268 hypertension, URTI, and RTI had the least symptoms of depression.

269

270  
271  
272  
273  
274  
275  
276  
277  
278  
279  
280  
281  
282  
283  
284  
285  
286  
287  
288  
289  
290  
291  
292

## Discussion

This study has shown that the likelihood of no symptoms or mild symptoms of depression is commoner among respondents with no symptoms of Acute Respiratory Infection (ARI). Though causality cannot be inferred, the association is statistically significant (see Table 4). However, there was no significant difference between respondents with ARI symptoms and no ARI symptoms on moderate to high risk of the symptoms of depression. The respondents with symptoms of ARI had a higher prevalence of symptoms of depression (19.6%), compared to those with no symptoms of ARI (14.4%).

The symptoms of ARI were prevalent among the respondents who presented as outpatients at private and public health facilities. The most typical diagnoses were malaria and typhoid fever. The most familiar symptoms of ARI are sore throat, fever, and cough. The diagnosis of COVID-19, one of the differential diagnoses of ARI based purely on symptomatology, can be misleading because many common conditions (malaria, typhoid fever) present with similar symptoms.

This study has also shown that the unemployed and house-wives and those with diagnoses of diabetes and typhoid fever accounted for a higher proportion of the symptoms of depression, such as the feeling of sadness, easy tiredness, sleep disturbance, low appetite, and commoner among female than male in both respondents with ARI symptoms and without ARI symptoms. However, this pattern may reflect the higher percentage of females (64%) among the total case and control respondents. These findings are consistent with previous studies that demonstrated a high prevalence of the symptoms of depression and features of other mental illnesses among clients who presented with symptoms of ARI [24].



## 293 **Implications**

294 Since the symptoms of depression can manifest in common conditions like malaria, typhoid  
295 fever, diabetes, and hypertension, clinicians should widen their scope when profiling clients for  
296 the risk of depression. The diagnosis of COVID-19 requires detailed history taking, with  
297 particular attention to onset, duration, and severity of symptoms, travel history, and contact with  
298 people suffering from symptoms suggestive of COVID-19 or diagnosis of COVID-19.

299

## 300 **Local and Regional Implications**

301 The decline in the incidence of COVID-19 should be sustained through reinforced risk  
302 communication, community engagement, and enforcement of non-pharmaceutical interventions,  
303 like social distancing, handwashing with soap under running water, and use of facemasks,  
304 environmental sanitation, and personal hygiene. The political leadership at the local and regional  
305 levels working through the relevant response organs (Nigeria's Presidential Taskforce and  
306 African Union's Centre for Disease Control and Prevention) should engage and collaborate with  
307 traditional and religious institutions and their leadership, and other professional bodies and  
308 institutions to deepen awareness of COVID-19 infections, its transmission, and prevention  
309 measures, and clear all myths on COVID-19 vaccination. This engagement will promote the  
310 uptake of the COVID-19 vaccine, especially among the elderly and the vulnerable population  
311 (those living with co-morbidity, like diabetes and hypertension).

312 The local and regional leaders should also engage political leaders at all levels through periodic  
313 physical and virtual meetings and interactions to identify successes and challenges and provide  
314 policy direction, resources, and workforce to overcome the economic, social, medical, and  
315 personal losses to the COVID-19 pandemic, especially in developing countries like Nigeria.

316

### 317 **International Implications**

318 The World Health Organization (WHO) should continue to lead the coordinated response to  
319 COVID-19 through collaboration with national governments, development partners, and donors.  
320 WHO should sustain her leadership role, policy, technical assistance, research and advocacy, and  
321 resource mobilization in the face of the rampaging COVID-19 pandemic. The WHO working  
322 with other development partners and donors, should support low and middle-income countries,  
323 especially in Africa and Asia, with policy and technical assistance, free COVID-19 vaccines,  
324 PPEs, and financial grants to enable fragile states to cope with the unprecedented economic,  
325 social, and personal losses to COVID-19 pandemic.

326 The one health approach through sustained communication, collaboration, and coordination of  
327 human health, animal health, and environmental interventions remains the proven response to the  
328 COVID-19 pandemic and other emerging and re-emerging diseases.

329

### 330 **Recommendations**

331 The study has shown more respondents with symptoms of ARI visited the Primary Healthcare  
332 Centers (PHC), where most health workers have limited skills and training in treating mental  
333 illnesses, such as depression. Having psychiatrists, psychologists, and mental health specialists  
334 posted to PHCs in developing countries may be challenging; however, the Community Health  
335 Officers (CHO) and Community Health Extension Workers (CHEW) can receive sufficient  
336 training in mental health to enable them to profile clients with symptoms of depression and other  
337 mental illnesses and refer clients with symptoms of depression to appropriate facilities for better  
338 care.

339 Establishing a robust, efficient, and effective referral system, with the protocol fully  
340 communicated to health workers and managers at the different levels of care, will reduce delays  
341 in the referral of clients and improve the overall care of clients with mental illnesses like  
342 depression.

343 The high prevalence of symptoms of depression among those with symptoms of ARI and those  
344 without symptoms of ARI demands more attention and resources to diagnose and care for clients  
345 with mental illnesses which may be co-morbid with other common conditions, like malaria,  
346 typhoid fever, diabetes, hypertension and so forth. The leadership of developing countries should  
347 allocate more resources to health and a significant proportion to address the high burden of  
348 mental illness that accounts for colossal Disability Adjusted Life Years (DALYs) in most Low-  
349 and Middle-Income Countries (LMICs), like Nigeria [30].

350 The education and sensitization of clients and the public will increase the awareness of  
351 symptoms of depression, improve the health-seeking behaviors of the citizens, lead to early  
352 presentation to health facilities, and reduce visits to quacks and unlicensed mental health  
353 practitioners.

#### 354 **Limitations**

355 The study was cross-sectional, and no causality was inferred. ARI is not a cause of symptoms of  
356 depression. The study was conducted in only four (4) out of the 23 LGAs of Kaduna State,  
357 though the sample size was significant, and the findings can be generalized to the total  
358 population. Some of the BDI items or questionnaires tapped on profoundly personal and  
359 relationship experiences that may provoke pain or trauma; though un-intended, the researcher  
360 and his assistants obtained informed consent from respondents after counseling and adequately

361 explained the nature, objectives, and scope of the study in the preferred language. Recall bias  
362 was considered a limitation as participants were to provide information on the health occurrence  
363 in the two weeks before data collection.

#### 364 **The Need for Further Research**

365 Further research is needed to fully explore the relationship between common medical conditions,  
366 for example, malaria, typhoid fever, diabetes, and symptoms of depression and other mental  
367 health illnesses. The prevalence of other mental illnesses, like anxiety disorders, should be  
368 investigated, and results should be disseminated to health workers and managers to appropriately  
369 guide clients' profiling, care, and management.

#### 370 **Conclusion**

371 Though symptoms of depression were common among respondents who presented with  
372 symptoms of Acute Respiratory Infection (ARI) at the Outpatient Department (OPD), causality  
373 cannot be inferred. Many common conditions, like malaria, typhoid fever, diabetes, and  
374 hypertension, can manifest with symptoms of depression, and clinicians can miss the diagnosis  
375 of mental illness like depression if other distinguishing features of depression are not elicited  
376 through detailed history taking, examination, and investigation by qualified and trained health  
377 workers. The burden of mental illness, like depression, is enormous and accounts for many  
378 Disability Adjusted Life Years (DALYs) in LMICs. More resources, a trained and motivated  
379 workforce, and other support to diagnose, care and manage clients presenting with symptoms of  
380 depression and other mental illnesses in private and public health facilities are needed, especially  
381 in LMICs.

382

383 **Acknowledgments**

384 We are grateful to the research assistants (Grace Barnabas, Rebecca Boniface, Hafsat Aliyu,  
385 Khadija Ahmed, Amina Umar Madaki, Halima Danjuma, Alice Itodo, Bilikisu Baba, Maryam  
386 Ahmed, Zafira Ismail, Alheri John, Aisha Inuwa, Habiba Suleiman, Aisha Ibrahim, and Ann  
387 Utomi), who facilitated respondents' interviews and data collection, and others for their support  
388 and efforts in preparing this manuscript.

389

390 **Abbreviations**

|     |        |   |                                                        |
|-----|--------|---|--------------------------------------------------------|
| 391 | ARI    | – | Acute Respiratory Infections                           |
| 392 | BDI    | – | Beck's Depression Inventory                            |
| 393 | CEPI   | – | Epidemic Preparedness and Innovation                   |
| 394 | CHEW   | – | Community Health Environmental Worker                  |
| 395 | CHO    | – | Community Health Officer                               |
| 396 | COVAX  | – | Coalition for COVID-19 vaccine led by WHO              |
| 397 | DALY   | – | Disability Adjusted Life Year                          |
| 398 | DSM-IV | – | Diagnostic and Statistical Manual IV for Mental Health |
| 399 | LGA    | – | Local Government Area                                  |
| 400 | LMIC   | – | Low and Middle-Income Countries                        |
| 401 | LRTI   | – | Lower Respiratory Tract Infection                      |
| 402 | NLR    | – | Neutrophil to Lymphocyte Ratio                         |
| 403 | NPI    | – | Non- Pharmaceutical Interventions                      |
| 404 | PCR    | – | Polymerase Chain Reaction                              |
| 405 | PHC    | – | Primary Health Care                                    |
| 406 | PHEIC  | – | Public Health Emergency of International Concern       |

|     |            |   |                                                 |
|-----|------------|---|-------------------------------------------------|
| 407 | PPE        | – | Personal Protective Equipment                   |
| 408 | PPS        | – | Proportional Probability Size                   |
| 409 | RDT        | – | Rapid Diagnostic Test                           |
| 410 | RSV        | – | Respiratory Syncytial Virus                     |
| 411 | RTI        | – | Respiratory Tract Infection                     |
| 412 | RT-PCR     | – | Reverse Transcriptase Polymerase Chain Reaction |
| 413 | SARS-CoV-2 | – | Severe Acute Respiratory Syndrome Coronavirus 2 |
| 414 | SPSS       | – | Statistical Package for Social Sciences         |
| 415 | UNICEF     | – | United Nations Children Funds                   |
| 416 | URTI       | – | Upper Respiratory Tract Infection               |
| 417 | WHO        | – | World Health Organization                       |
| 418 |            |   |                                                 |
| 419 |            |   |                                                 |
| 420 |            |   |                                                 |

421

422

## References

423

1. World Bank. COVID-19 to Plunge Global Economy into Worst Recession since

424

World War II. 2020. Available at <https://worldbank.org/en/news/press>

425

[release/2020/06/08/covid-19-to-plunge-global-economy-into-worst-recession-since-](https://worldbank.org/en/news/press-release/2020/06/08/covid-19-to-plunge-global-economy-into-worst-recession-since-world-war-ii)

426

[world-war-ii](https://worldbank.org/en/news/press-release/2020/06/08/covid-19-to-plunge-global-economy-into-worst-recession-since-world-war-ii). Accessed 14th September, 2020.

427

2. Pan A, Liu L, Wang C, Guo H, Hao X, Wang Q, et al. Association of Public Health

428

Interventions with the Epidemiology of the COVID-19 Outbreak in Wuhan, China.

429

*JAMA - J Am Med Assoc.* 2020; 323(19):1915-1923. doi:10.1001/jama.2020.6130.

430

Accessed 14th September, 2020.

431

3. Kim DD, Neumann PJ. Analyzing the Cost-Effectiveness of Policy Responses for

432

COVID-19: The Importance of Capturing Social Consequences. *Med Decis Mak.*

433

2020; 40(3):251-253. doi:10.1177/0272989X20922987. Accessed 14th September,

434

2020.

435

4. Esposito S, Principi N. School Closure During the Coronavirus Disease 2019

436

(COVID-19) Pandemic An Effective Intervention at the Global Level? *J Am Med*

437

*Assoc.* 2020. doi:10.1001/jamapediatrics.2020.1892. Accessed 14th September, 2020.

438

5. Wang X, Zhou Q, He Y, Liu L, Ma X, Wei X, et al. Nosocomial outbreak of COVID-

439

19 pneumonia in Wuhan, China. *Eur Respir J.* 2020; 55(6).

440

doi:10.1183/13993003.00544-2020. Accessed 14th September, 2020.

441

6. Mahase E. China coronavirus: WHO declares international emergency as death toll

442

exceeds 200. *BMJ.* 2020; 368(January):m408. doi:10.1136/bmj.m408. Accessed 14th

443

September, 2020.



- 444 7. Cucinotta D, Vanelli M. WHO declares COVID-19 a pandemic. *Acta Biomed.* 2020;  
445 91(1):157-160. doi:10.23750/abm.v91i1.9397. Accessed 14th September, 2020.
- 446 8. World Health Organization. "Coronavirus Disease 2019 (COVID-19) Situation  
447 Report. [https://www.who.int/docs/default-source/coronaviruse/situation-reports-sitrep-covid-19.pdf?sfvrsn=2ba4e093\\_2](https://www.who.int/docs/default-source/coronaviruse/situation-reports-sitrep-covid-19.pdf?sfvrsn=2ba4e093_2)" 2023 no. January (2023).  
448  
449 [https://www.who.int/docs/default-source/coronaviruse/situation-reports/-sitrep-covid-19.pdf?sfvrsn=2ba4e093\\_2](https://www.who.int/docs/default-source/coronaviruse/situation-reports/-sitrep-covid-19.pdf?sfvrsn=2ba4e093_2). Accessed January 15, 2023.
- 451 9. Nigeria Centre for Disease Control (NCDC). "Covid-19 Situation Report: Situation  
452 Report." *Nigeria Centre for Disease Control*, no. January (2023).  
453 <https://covid19.ncdc.gov.ng/> Accessed 20th January, 2022.
- 454 10. Daniel, OJ, and JO Bamidele. "Epidemiology of Coronavirus Disease (COVID-19) in  
455 Nigeria." *Annals of Health Research* 6, no. 2 (2020): 125–32.  
456 <https://doi.org/10.30442/ahr.0602-01-74>. Accessed 20th January, 2022.
- 457 11. Huang, Chaolin, Yeming Wang, Xingwang Li, Lili Ren, Jianping Zhao, Yi Hu, Li  
458 Zhang, et al. "Clinical Features of Patients Infected with 2019 Novel Coronavirus in  
459 Wuhan, China." *The Lancet* 395, no. 10223 (2020): 497–506.  
460 [https://doi.org/10.1016/S0140-6736\(20\)30183-5](https://doi.org/10.1016/S0140-6736(20)30183-5). Accessed 20th January, 2022.
- 461 12. Li, Qun, Xuhua Guan, Peng Wu, Xiaoye Wang, Lei Zhou, Yeqing Tong, Ruiqi Ren, et  
462 al. "Early Transmission Dynamics in Wuhan, China, of Novel Coronavirus-Infected  
463 Pneumonia." *New England Journal of Medicine* 382, no. 13 (2020): 1199–1207.  
464 <https://doi.org/10.1056/NEJMoa2001316>. Accessed 20th January, 2022.
- 465 13. Ogechukwu Vincent Opkala et al. "Population seroprevalence of SARS-CoV-2  
466 antibodies in Anambra, South-East, Nigeria." *International Journal of Infectious*

- 467            *Diseases* 110 (2021) 171-178, DOI:<https://doi.org/10.1016/j.ijid.2021.07.040>.
- 468            (Accessed 20th January, 2022).
- 469        14.    Chen, Nanshan, Min Zhou, Xuan Dong, Jieming Qu, Fengyun Gong, Yang Han, Yang
- 470            Qiu, et al. "Epidemiological and Clinical Characteristics of 99 Cases of 2019 Novel
- 471            Coronavirus Pneumonia in Wuhan, China: A Descriptive Study." *The Lancet* 395, no.
- 472            10223 (2020): 507–13. [https://doi.org/10.1016/S0140-6736\(20\)30211-7](https://doi.org/10.1016/S0140-6736(20)30211-7). Accessed
- 473            20th January, 2022.
- 474        15.    Liu, Kai, Ying Chen, Ruzheng Lin, and Kunyuan Han. "Clinical Features of COVID-
- 475            19 in Elderly Patients: A Comparison with Young and Middle-Aged Patients." *Journal*
- 476            *of Infection* 80, no. 6 (2020): e14–18. <https://doi.org/10.1016/j.jinf.2020.03.005>.
- 477            Accessed 20th January, 2022.
- 478        16.    Ward, Stephanie, Andrew Lindsley, Josh Courter, and Amal Assa'ad. "Clinical Testing
- 479            for COVID-19." *Journal of Allergy and Clinical Immunology* 146, no. 1 (2020): 23–
- 480            34. <https://doi.org/10.1016/j.jaci.2020.05.012>. Accessed 20th January, 2022.
- 481        17.    Giri, Anil K, and Divya Rsjb. "Charting the Challenges behind the Testing of COVID-
- 482            19 in Developing Countries : Nepal as a Case Study." *Biosafety and Health* 2, no.
- 483            January (2020). Accessed 20th January, 2022.
- 484        18.    Alzyood, Mamdooh, Debra Jackson, Helen Aveyard, and Joanne Brooke. "COVID-19
- 485            Reinforces the Importance of Hand Washing." *Journal of Clinical Nursing*, 2020, 1–2.
- 486            <https://doi.org/10.1111/jocn.15313>. Accessed 20th January, 2022.
- 487        19.    Cvetković, Vladimir M., Neda Nikolić, Una Radovanović Nenadić, Adem Öcal, Eric
- 488            K. Noji, and Miodrag Zečević. "Preparedness and Preventive Behaviors for a
- 489            Pandemic Disaster Caused by COVID-19 in Serbia." *International Journal of*

- 490 *Environmental Research and Public Health* 17, no. 11 (2020): 1–23.
- 491 <https://doi.org/10.3390/ijerph17114124>. Accessed January 20, 2022.
- 492 20. Villegas-Arenas, Oscar Alberto, Jaime Gómez, Jorge Uriel-López, Richard Nelson
- 493 Román, Jazmín, Eliana Villa, Jéssica Botero, and Nathalia García. “Measurement of
- 494 Handwashing Adherence , According To Five” 14, no. 2 (2017). Accessed January 20,
- 495 2022.
- 496 21. Ortega, Rafael, Mauricio Gonzalez, Ala Nozari, and Robert Canelli. "Personal
- 497 Protective Equipment and Covid-19." *New England Journal of Medicine* 382, no. 26
- 498 (2020): e105. <https://doi.org/10.1056/nejmvcm2014809>. Accessed 20th January, 2022.
- 499 22. World Health Organization (WHO), "Coronavirus disease (COVID-19): vaccine
- 500 access and allocation," Available at [https://www.who.int/news-room/q-a-](https://www.who.int/news-room/q-a-detail/coronavirus-disease-(covid-19)-vaccine-access-and-allocation)
- 501 [detail/coronavirus-disease-\(covid-19\)-vaccine-access-and-allocation](https://www.who.int/news-room/q-a-detail/coronavirus-disease-(covid-19)-vaccine-access-and-allocation). Accessed 20th
- 502 January, 2022.
- 503 23. Global Vaccine Alliance (Gavi). "The Gavi COVAX AMC Explained," Available at
- 504 <https://www.gavi.org/vaccineswork/gavi-covax-amc-explained>. Accessed 20th
- 505 December, 2020.
- 506 24. Gureje O, Uwakwe R, Oladeji B, Makanjuola VO, Esan O. "Depression in adult
- 507 Nigerians: results from the Nigerian Survey of Mental Health and Well-being." *J*
- 508 *Affect Disord.* 2010 Jan;120(1-3):158-64. doi: 10.1016/j.jad.2009.04.030. PMID:
- 509 19450883. Accessed 20th January, 2022.
- 510 25. World Health Organization. Depression: Overview. [https://www.who.int/news-](https://www.who.int/news-room/fact-sheets/detail/depression)
- 511 [room/fact-sheets/detail/depression](https://www.who.int/news-room/fact-sheets/detail/depression). Accessed 20th January, 2022.
- 512 26. Cohen, Myron S., and Lawrence Corey. "Combination Prevention for COVID-19."

- 513                    *Science* 368, no. 6491 (2020): 551. <https://doi.org/10.1126/science.abc5798>. Accessed  
514                    20th January, 2022.
- 515            27.    National Population Commission. "Legal Notice on Publication of 2006 Census Final  
516                    Results." *Federal Republic of Nigeria Official Gazette*, 2009. Accessed 20th January,  
517                    2022.
- 518            28.    Creative Research Systems. Your Complete Survey Software Solutions Since 1982.  
519                    <https://www.surveysystem.com/sscalc.htm> (Accessed on 18th February 2022).
- 520            29.    García-Batista, Zoilo Emilio, Kiero Guerra-Peña, Antonio Cano-Vindel, Solmary  
521                    Xiomara Herrera-Martínez, and Leonardo Adrián Medrano. "Validity and Reliability  
522                    of the Beck Depression Inventory (BDI-II) in General and Hospital Population of  
523                    Dominican Republic." *PLoS ONE* 13, no. 6 (2018): 1–12.  
524                    <https://doi.org/10.1371/journal.pone.0199750>. Accessed January 20, 2022.
- 525            30.    National Institute of Mental Health. Transforming the Understanding and treatment of  
526                    Mental Illnesses: Depression. <https://www.nimh.nih.gov/health/topics/depression>.  
527                    Accessed 20th January, 2022.
- 528
- 529

530 **Contributors:** The study design and methods were by GCU and LC. GCU, MJ, and  
531 AA participated in data collection and collation. GUC and LC reviewed the study  
532 design and the drafts. GCU, LC, MJ, AA, DSH, MO, HBY, BA, RTM, MA, SA, JD,  
533 NI, AB, CK, MC, I, and DM did data analysis and discussion. All authors read and  
534 approved the final manuscript.

535 **Funding:** This work received no financial support from WHO, Nigeria.

536 **Disclaimer:** The views expressed are those of the authors and do not necessarily  
537 reflect those of WHO, the Kaduna State Ministry of Health, or any other organization  
538 that the authors are affiliated with.

539 **Competing interests:** None declared.

540 **Patient and public involvement:** Patients and the public were not involved in the  
541 research design, conduct, reporting or dissemination plans.

542 **Patient consent for publication:** Not required.

543 **Ethics approval:** The researcher sought and obtained ethical approval  
544 (NHREC/17/03/2018) from the Kaduna State Ministry of Health—only respondents  
545 who willingly gave written informed consent after a clear protocol explanation  
546 participated in the study.

547 **Data availability statement:** All data are available on the article, and more  
548 information on request to the corresponding author (GCU) @ [umehg@who.int](mailto:umehg@who.int)

549

550

551 Table 1

552 *Demographic Characteristics of the Respondents*

| Characteristics | ARI Symptoms N (%) | No ARI Symptoms N (%) | <sup>1</sup> P-value |
|-----------------|--------------------|-----------------------|----------------------|
| Age (Years)     |                    |                       | P=0.965              |
| <15             | 10 (3%)            | 10 (2%)               |                      |
| 15-19           | 47 (12%)           | 51 (13%)              |                      |
| 20-24           | 52 (13%)           | 85 (21%)              |                      |
| 25-29           | 82 (21%)           | 79 (20%)              |                      |
| 30-34           | 46 (12%)           | 54 (13%)              |                      |
| 35-39           | 38 (10%)           | 48 (12%)              |                      |
| 40-44           | 37 (9%)            | 32 (8%)               |                      |
| 45-49           | 22 (6%)            | 18 (4%)               |                      |
| 50-54           | 23 (6%)            | 11 (3%)               |                      |
| 55-59           | 13 (3%)            | 4 (1%)                |                      |
| 60-64           | 13 (3%)            | 4 (1%)                |                      |
| 65-69           | 5 (1%)             | 4 (1%)                |                      |
| >70             | 8 (2%)             | 2 (0%)                |                      |

---

Level of Education<sup>2</sup> P=0.976

|           |           |           |
|-----------|-----------|-----------|
| Quaranic  | 58 (15%)  | 51 (13%)  |
| Primary   | 55 (14%)  | 51 (13%)  |
| Secondary | 185 (47%) | 213 (53%) |
| Tertiary  | 98 (25%)  | 87 (22%)  |

Occupation P=0.974

|                       |           |           |
|-----------------------|-----------|-----------|
| Petty Trader          | 93 (23%)  | 111 (28%) |
| Big Time Trader       | 5 (1%)    | 11 (3%)   |
| Private Sector Worker | 29 (7%)   | 29 (7%)   |
| Government Worker     | 31 (8%)   | 20 (5%)   |
| House-wife            | 118 (30%) | 100 (25%) |
| Unemployed            | 120 (30%) | 131 (33%) |

---

---

| Income (USD/Day) <sup>3</sup> |           | P=0.986   |
|-------------------------------|-----------|-----------|
| <0.86                         | 284 (72%) | 272 (68%) |
| 0.86 – 1.09                   | 43 (11%)  | 66 (16%)  |
| 1.10 – 1.49                   | 19 (5%)   | 21 (5%)   |
| 1.50 – 1.69                   | 17 (4%)   | 11 (3%)   |
| >1.70                         | 33 (8%)   | 32 (8%)   |

---

553

554 <sup>1</sup>Statistical significance at p<0.05 (2-tailed)

555 <sup>2</sup>Quaranic=2 years schooling; Primary=6years; Secondary=9-12years; Tertiary=16years and  
556 above

557 <sup>3</sup>Prevailing exchange rate of 580 Naira to 1 USD

558



559 Table 2

560 *Features of Respondents Presenting with Symptoms of Acute Respiratory Infections (ARI)*

|                | N   | %   |
|----------------|-----|-----|
| <hr/>          |     |     |
| Symptoms       |     |     |
| Fever          | 331 | 21% |
| Cough          | 319 | 20% |
| Sorethroat     | 401 | 25% |
| Sneezing       | 67  | 4%  |
| Breathlessness | 14  | 1%  |
| Loss of Taste  | 61  | 4%  |
| Body Weakness  | 118 | 7%  |
| Malaise        | 15  | 1%  |
| Headache       | 226 | 14% |
| Insomnia       | 15  | 1%  |
| Abdominal Pain | 3   | 0%  |
| Cattarah       | 3   | 0%  |
| Dizziness      | 2   | 0%  |

---

---

|                              |     |     |
|------------------------------|-----|-----|
| Heartburn                    | 1   | 0%  |
| Nausea                       | 1   | 0%  |
| Symptoms Duration            |     |     |
| >14 days                     | 28  | 7%  |
| 10-14 days                   | 27  | 7%  |
| 1-2 days                     | 52  | 13% |
| 3-4days                      | 183 | 46% |
| 5-6 days                     | 79  | 20% |
| 7-10 days                    | 27  | 7%  |
| Facility Visited             |     |     |
| Primary (PHC)                | 312 | 79% |
| Private Hospital             | 45  | 11% |
| Secondary (General Hospital) | 32  | 8%  |
| Tertiary (Teaching Hospital) | 7   | 2%  |

---

---

Clinician Seen

|                      |     |     |
|----------------------|-----|-----|
| CHEW <sup>1</sup>    | 197 | 50% |
| CHO <sup>2</sup>     | 73  | 18% |
| Consultant Physician | 16  | 4%  |
| Medical Officer      | 77  | 19% |
| RN <sup>3</sup>      | 33  | 8%  |

Clinical Diagnosis

|                   |     |     |
|-------------------|-----|-----|
| Diabetes          | 1   | 0%  |
| Hypertension      | 11  | 3%  |
| Malaria           | 17  | 45% |
| Pregnancy         | 8   | 2%  |
| LRTI <sup>4</sup> | 28  | 7%  |
| Typhoid Fever     | 112 | 28% |
| Tuberculosis      | 15  | 4%  |
| Ulcer             | 2   | 1%  |
| COVID-19          | 1   | 0%  |
| Asthma            | 19  | 5%  |

---

---

|                                   |     |     |
|-----------------------------------|-----|-----|
| URTI <sup>5</sup>                 | 20  | 5%  |
| Satisfied with Treatment          |     |     |
| No                                | 11  | 3%  |
| Yes                               | 385 | 97% |
| Recovered after Treatment         |     |     |
| No                                | 44  | 11% |
| Yes                               | 352 | 89% |
| Recovery Days                     |     |     |
| 10-14 days                        | 13  | 4%  |
| 1-2 days                          | 110 | 31% |
| 3-4days                           | 155 | 44% |
| 5-6 days                          | 54  | 15% |
| 7-10 days                         | 20  | 6%  |
| Family History of Similar Illness |     |     |
| No                                | 272 | 69% |
| Yes                               | 124 | 31% |

---

---

Know Anybody with Similar Illness

|     |     |     |
|-----|-----|-----|
| No  | 258 | 65% |
| Yes | 138 | 35% |

---

561

562 <sup>1</sup>Community Health Environmental Worker

563 <sup>2</sup>Community Health Officer

564 <sup>3</sup>Registered Nurse

565 <sup>4</sup>Lower Respiratory Tract Infection

566 <sup>5</sup>Upper Respiratory Tract Infection

567

568 Table 3

569 *Distribution of Respondents' Scores on Beck's Depression Inventory*

| Items                                                             | ARI Symptoms N (%) | No ARI Symptoms N (%) |
|-------------------------------------------------------------------|--------------------|-----------------------|
| 0. I am no more irritated by things than I ever was.              | 327 (49%)          | 342 (51%)             |
| 0. I am no more worried about my health than usual.               | 310 (48%)          | 341 (52%)             |
| 0. I can sleep as well as usual.                                  | 272 (46%)          | 323 (54%)             |
| 0. I can work about as well as before.                            | 300 (47%)          | 341 (53%)             |
| 0. I don't cry any more than usual.                               | 338 (49%)          | 347 (51%)             |
| 0. I don't feel I am any worse than anybody else.                 | 341 (49%)          | 358 (51%)             |
| 0. I don't feel I am being punished.                              | 343 (49%)          | 356 (51%)             |
| 0. I don't feel that I look any worse than I used to.             | 345 (49%)          | 358 (51%)             |
| 0. I don't get more tired than usual.                             | 259 (45%)          | 323 (55%)             |
| 0. I don't have any thoughts of killing myself.                   | 357 (49%)          | 365 (51%)             |
| 0. I have not noticed any recent change in my<br>interest in sex. | 290 (47%)          | 323 (53%)             |
| 0. I make decisions about as well as I ever could.                | 344 (49%)          | 352 (51%)             |
| 0. I am not particularly discouraged about the future.            | 336 (49%)          | 350 (51%)             |

---

|                                                                                            |           |           |
|--------------------------------------------------------------------------------------------|-----------|-----------|
| 0. I do not feel like a failure.                                                           | 344 (49%) | 353 (51%) |
| 0. I do not feel sad.                                                                      | 283 (47%) | 315 (53%) |
| 0. I don't feel disappointed in myself.                                                    | 352 (49%) | 365 (51%) |
| 0. I don't feel particularly guilty                                                        | 330 (48%) | 352 (52%) |
| 0. I get as much satisfaction out of things as I used to.                                  | 308 (47%) | 341 (53%) |
| 0. I have not lost interest in other people.                                               | 332 (50%) | 336 (50%) |
| 0. I haven't lost much weight, if any, lately.                                             | 304 (47%) | 347 (53%) |
| 0. My appetite is no worse than usual.                                                     | 271 (45%) | 335 (55%) |
| 1. I am critical of myself for my weaknesses or mistakes.                                  | 41 (58%)  | 30 (42%)  |
| 1. I am disappointed in myself.                                                            | 33 (56%)  | 26 (44%)  |
| 1. I am less interested in other people than I used to be.                                 | 48 (49%)  | 50 (51%)  |
| 1. I am less interested in sex than I used to be.                                          | 71 (60%)  | 48 (40%)  |
| 1. I am slightly more irritated now than usual.                                            | 54 (54%)  | 46 (46%)  |
| 1. I am worried about physical problems like aches, pains, upset stomach, or constipation. | 57 (60%)  | 38 (40%)  |

---

---

|                                                                          |           |          |
|--------------------------------------------------------------------------|-----------|----------|
| 1. I am worried that I am looking old or unattractive.                   | 36 (55%)  | 29 (45%) |
| 1. I cry more now than I used to.                                        | 34 (50%)  | 34 (50%) |
| 1. I don't enjoy things the way I used to.                               | 73 (61%)  | 47 (39%) |
| 1. I don't sleep as well as I used to.                                   | 90 (61%)  | 57 (39%) |
| 1. I feel I may be punished.                                             | 34 (54%)  | 29 (46%) |
| 1. I get tired more easily than I used to.                               | 112 (64%) | 62 (36%) |
| 1. I have lost more than five pounds.                                    | 74 (65%)  | 40 (35%) |
| 1. I have thoughts of killing myself,<br>but I would not carry them out. | 27 (50%)  | 27 (50%) |
| 1. I put off making decisions more than I used to.                       | 34 (49%)  | 36 (51%) |
| 1. It takes an extra effort to get started at doing<br>something.        | 72 (64%)  | 41 (36%) |
| 1. My appetite is not as good as it used to be.                          | 107 (66%) | 56 (34%) |
| 1. I feel discouraged about the future.                                  | 44 (51%)  | 42 (49%) |
| 1. I feel guilty a good part of the time.                                | 51 (59%)  | 35 (41%) |
| 1. I feel I have failed more than the average person.                    | 38 (51%)  | 36 (49%) |
| 1. I feel sad                                                            | 96 (56%)  | 75 (44%) |

---



---

|                                                                                       |          |          |
|---------------------------------------------------------------------------------------|----------|----------|
| 2. I am disgusted with myself.                                                        | 8 (53%)  | 7 (47%)  |
| 2. I am quite annoyed or irritated a good deal of the time.                           | 11 (52%) | 10 (48%) |
| 2. I am very worried about physical problems , and it's hard to think of much else.   | 23 (55%) | 19 (45%) |
| 2. I blame myself all the time for my faults.                                         | 11 (52%) | 10 (48%) |
| 2. I cry all the time now.                                                            | 11 (65%) | 6 (35%)  |
| 2. I don't get real satisfaction out of anything anymore.                             | 11 (52%) | 10 (48%) |
| 2. I expect to be punished.                                                           | 14 (54%) | 12 (46%) |
| 2. I feel there are permanent changes in my appearance that make me look unattractive | 11 (55%) | 9 (45%)  |
| 2. I get tired from doing almost anything.                                            | 17 (52%) | 16 (48%) |
| 2. I have almost no interest in sex.                                                  | 26 (53%) | 23 (47%) |
| 2. I have greater difficulty in making decisions more than I used to.                 | 13 (50%) | 13 (50%) |
| 2. I have lost more than ten pounds.                                                  | 13 (52%) | 12 (48%) |
| 2. I have lost most of my interest in other people.                                   | 12 (52%) | 11 (48%) |

---

---

|                                                                                     |          |          |
|-------------------------------------------------------------------------------------|----------|----------|
| 2. I have to push myself very hard to do anything.                                  | 18 (50%) | 18 (50%) |
| 2. I wake up 1-2 hours earlier than usual and find it hard to get back to sleep.    | 24 (63%) | 14 (37%) |
| 2. I would like to kill myself.                                                     | 8 (73%)  | 3 (27%)  |
| 2. My appetite is much worse now.                                                   | 13 (59%) | 9 (41%)  |
| 2. As I look back on my life, all I can see is a lot of failures.                   | 11 (50%) | 11 (50%) |
| 2. I am sad all the time and I can't snap out of it.                                | 12 (57%) | 9 (43%)  |
| 2. I feel I have nothing to look forward to.                                        | 9 (50%)  | 9 (50%)  |
| 2. I feel quite guilty most of the time.                                            | 10 (45%) | 12 (55%) |
| 3. I am dissatisfied or bored with everything.                                      | 4 (50%)  | 4 (50%)  |
| 3. I am so worried about my physical problems that I cannot think of anything else. | 6 (60%)  | 4 (40%)  |
| 3. I am too tired to do anything.                                                   | 8 (89%)  | 1 (11%)  |
| 3. I believe that I look ugly.                                                      | 4 (40%)  | 6 (60%)  |
| 3. I blame myself for everything bad that happens.                                  | 3 (43%)  | 4 (57%)  |
| 3. I can't do any work at all.                                                      | 6 (75%)  | 2 (25%)  |

---

---

|                                                                                    |          |          |
|------------------------------------------------------------------------------------|----------|----------|
| 3. I can't make decisions at all anymore.                                          | 5 (83%)  | 1 (17%)  |
| 3. I feel I am being punished.                                                     | 5 (50%)  | 5 (50%)  |
| 3. I feel irritated all the time.                                                  | 4 (50%)  | 4 (50%)  |
| 3. I hate myself.                                                                  | 3 (43%)  | 4 (57%)  |
| 3. I have lost all of my interest in other people.                                 | 4 (44%)  | 5 (56%)  |
| 3. I have lost interest in sex completely.                                         | 9 (53%)  | 8 (47%)  |
| 3. I have lost more than fifteen pounds.                                           | 5 (63%)  | 3 (38%)  |
| 3. I have no appetite at all anymore.                                              | 5 (71%)  | 2 (29%)  |
| 3. I used to be able to cry, but now I can't<br>cry even though I want to.         | 13 (46%) | 15 (54%) |
| 3. I wake up several hours earlier than I<br>used to and cannot get back to sleep. | 10 (56%) | 8 (44%)  |
| 3. I would kill myself if I had the chance.                                        | 4 (36%)  | 7 (64%)  |
| 3. I am so sad and unhappy that I can't stand it.                                  | 5 (63%)  | 3 (38%)  |
| 3. I feel guilty all of the time.                                                  | 5 (63%)  | 3 (38%)  |
| 3. I feel I am a complete failure as a person.                                     | 3 (60%)  | 2 (40%)  |
| 3. I feel the future is hopeless and that things                                   |          |          |

---

---

|                 |         |         |
|-----------------|---------|---------|
| cannot improve. | 7 (88%) | 1 (13%) |
|-----------------|---------|---------|

---

570

571

572 Table 4

573 *A comparison of Mean, Standard Deviation, and P-value Scores of Respondents on the Beck*  
 574 *Depression Inventory and the Prevalence of Symptoms of Depression*

|                                          | Mean              | SD   | P-value  | r      |
|------------------------------------------|-------------------|------|----------|--------|
| No Risk of Depression <sup>1</sup>       |                   |      |          |        |
| ARI Symptoms (Case)                      | 318.4             | 29.6 | 0.000952 | 0.882* |
| No ARI Symptoms (Control)                | 344.0             | 14.2 |          |        |
| Mild risk of Depression <sup>2</sup>     |                   |      |          |        |
| ARI Symptoms (Case)                      | 58.4              | 26.0 | 0.0135   | 0.863* |
| No ARI Symptoms (Control)                | 42.1              | 12.7 |          |        |
| Moderate Risk of Depression <sup>3</sup> |                   |      |          |        |
| ARI Symptoms (Case)                      | 13.6              | 5.1  | 0.178    | 0.866* |
| No ARI Symptoms (Control)                | 11.6              | 4.6  |          |        |
| High Risk of Depression <sup>4</sup>     |                   |      |          |        |
| ARI Symptoms (Case)                      | 5.6               | 2.5  | 0.174    | 0.612* |
| No ARI Symptoms (Control)                | 4.4               | 3.2  |          |        |
| Prevalence of Symptoms of Depression     |                   |      |          |        |
| ARI Symptoms (Case)                      | 19.6% (1630/8316) |      |          | 0.122* |
| No ARI Symptoms (Control)                | 14.4% (1219/8442) |      |          |        |

575 \* Pearson's coefficient of correlation at P<0.05

576 <sup>1</sup>Cumulative scores on all items (questionnaires) starting with 0

577 <sup>2</sup>Cumulative scores on all items (questionnaires) starting with 1

578 <sup>3</sup>Cumulative scores on all items (questionnaires) starting with 2

579 <sup>4</sup>Cumulative scores on all items (questionnaires) starting with 3

580

581

582

medRxiv preprint doi: <https://doi.org/10.1101/2023.07.02.23292139>; this version posted July 6, 2023. The copyright holder for this preprint (which was not certified by peer review) is the author/funder, who has granted medRxiv a license to display the preprint in perpetuity. It is made available under a CC-BY 4.0 International license.

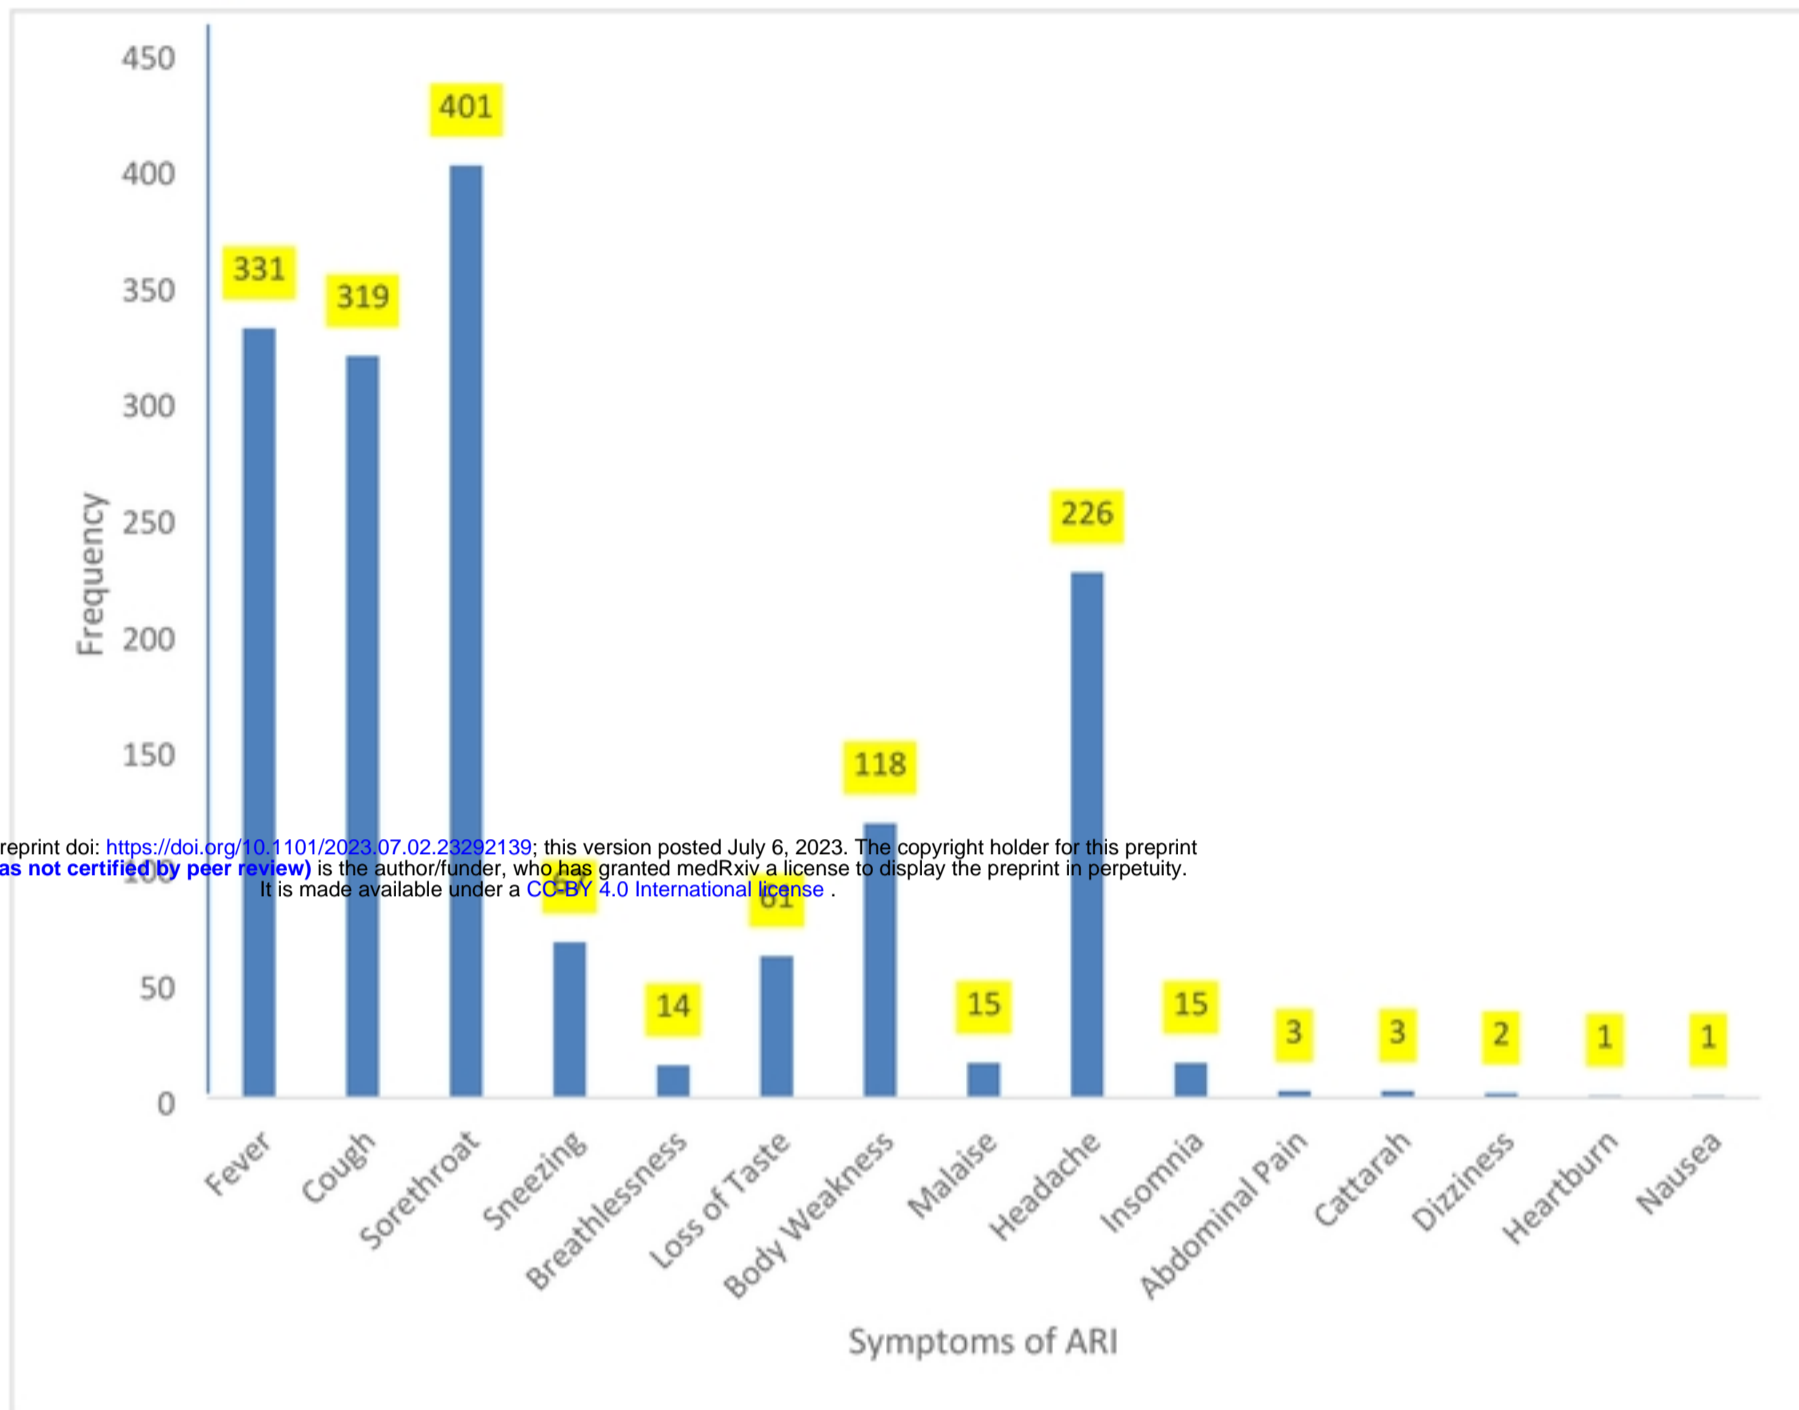

**Figure 1: Symptoms of ARI among Respondents Who Presented at the Outpatient Department of Health facility With Symptoms of ARI**

medRxiv preprint doi: <https://doi.org/10.1101/2023.07.02.23292139>; this version posted July 6, 2023. The copyright holder for this preprint (which was not certified by peer review) is the author/funder, who has granted medRxiv a license to display the preprint in perpetuity. It is made available under a [CC-BY 4.0 International license](https://creativecommons.org/licenses/by/4.0/).

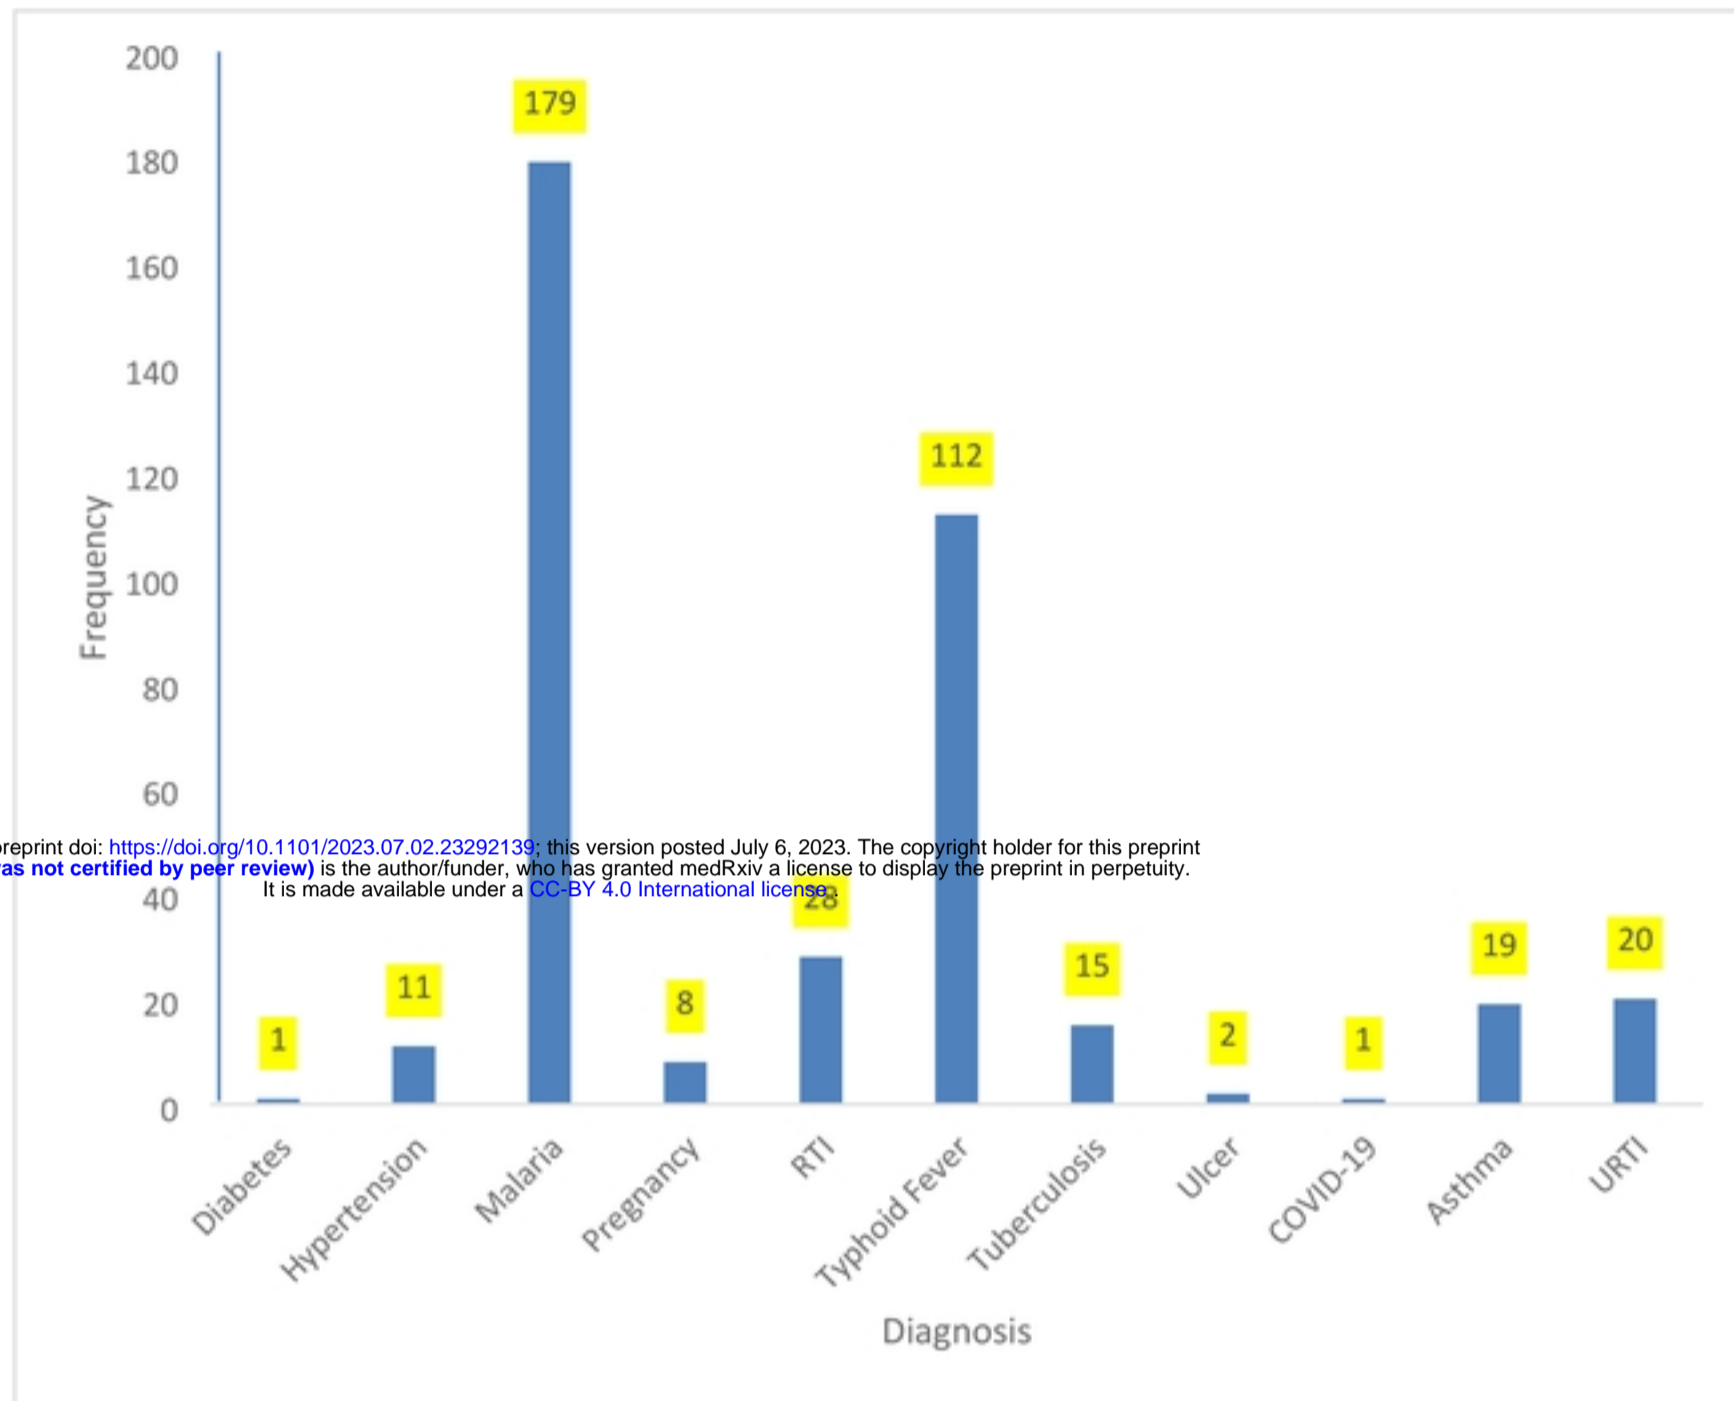

**Figure 2: Diagnosis by Clinicians of Respondents Who Presented at the Outpatient Department of Health facility With Symptoms of ARI**
